# Supplementary material for: Time in Target Range for Systolic Blood Pressure and Cardiovascular Outcomes in Patients With Heart Failure With Preserved Ejection Fraction
Source: PubMed Central journal article supplement — J Am Heart Assoc. 2022 Mar 15;11(7):e022765. doi: 10.1161/JAHA.121.022765 (PMC9075464; doi:10.1161/jaha.121.022765), 2022-03-15

# **Supplemental Material**

**Table S1. Association between Time in Systolic Blood Pressure Target Range with Clinical Outcomes across**

**Treatment Arm.**

|                             | n / N (%)       | Unadjusted model  |         | Fully adjusted model |         |
|-----------------------------|-----------------|-------------------|---------|----------------------|---------|
|                             |                 | HR (95% CI)       | P value | HR (95% CI)          | P value |
| <b>In Spironolactone</b>    |                 |                   |         |                      |         |
| <b>Primary endpoint</b>     |                 |                   |         |                      |         |
| 1-SD increment              | 260/1606 (16.2) | 0.79 (0.70, 0.90) | <0.001  | 0.82 (0.71, 0.95)    | 0.006   |
| TTR groups                  |                 |                   |         |                      |         |
| 0-25%                       | 90/490 (18.4)   | 1.00 (Ref)        | -       | 1.00 (Ref)           | -       |
| >25-50%                     | 56/240 (23.3)   | 1.35 (0.97, 1.89) | 0.077   | 1.11 (0.79, 1.57)    | 0.551   |
| >50-75%                     | 50/277 (18.1)   | 0.95 (0.67, 1.34) | 0.775   | 0.76 (0.53, 1.09)    | 0.141   |
| >75-100%                    | 64/599 (10.7)   | 0.56 (0.41, 0.77) | <0.001  | 0.65 (0.46, 0.91)    | 0.013   |
| <b>All-cause mortality</b>  |                 |                   |         |                      |         |
| 1-SD increment              | 222/1606 (13.8) | 0.83 (0.73, 0.95) | 0.007   | 0.82 (0.71, 0.95)    | 0.008   |
| TTR groups                  |                 |                   |         |                      |         |
| 0-25%                       | 73/490 (14.9)   | 1.00 (Ref)        | -       | 1.00 (Ref)           | -       |
| >25-50%                     | 43/240 (17.9)   | 1.27 (0.87, 1.85) | 0.215   | 1.03 (0.70, 1.51)    | 0.895   |
| >50-75%                     | 44/277 (15.9)   | 1.03 (0.71, 1.50) | 0.859   | 0.86 (0.59, 1.26)    | 0.445   |
| >75-100%                    | 62/599 (10.4)   | 0.68 (0.49, 0.96) | 0.026   | 0.70 (0.49, 0.99)    | 0.047   |
| <b>Cardiovascular death</b> |                 |                   |         |                      |         |
| 1-SD increment              | 137/1606 (8.5)  | 0.79 (0.67, 0.93) | 0.006   | 0.78 (0.65, 0.94)    | 0.010   |
| TTR groups                  |                 |                   |         |                      |         |
| 0-25%                       | 49/490 (10.0)   | 1.00 (Ref)        | -       | 1.00 (Ref)           | -       |
| >25-50%                     | 28/240 (11.7)   | 1.23 (0.77, 1.95) | 0.392   | 1.04 (0.64, 1.68)    | 0.875   |
| >50-75%                     | 26/277 (9.4)    | 0.91 (0.57, 1.47) | 0.710   | 0.84 (0.52, 1.37)    | 0.482   |
| >75-100%                    | 34/599 (5.7)    | 0.56 (0.36, 0.87) | 0.009   | 0.57 (0.35, 0.91)    | 0.018   |
| <b>HF hospitalization</b>   |                 |                   |         |                      |         |

|                             |                 |                   |        |                   |        |
|-----------------------------|-----------------|-------------------|--------|-------------------|--------|
| 1-SD increment              | 158/1606 (9.8%) | 0.78 (0.67, 0.91) | 0.002  | 0.83 (0.69, 0.99) | 0.042  |
| <b>TTR groups</b>           |                 |                   |        |                   |        |
| 0-25%                       | 53/490 (10.8)   | 1.00 (Ref)        | -      | 1.00 (Ref)        | -      |
| >25-50%                     | 37/240 (15.4)   | 1.52 (0.99, 2.31) | 0.051  | 1.21 (0.78, 1.87) | 0.390  |
| >50-75%                     | 32/277 (11.6)   | 1.03 (0.67, 1.60) | 0.881  | 0.76 (0.48, 1.21) | 0.246  |
| >75-100%                    | 36/599 (6.0)    | 0.54 (0.35, 0.82) | 0.004  | 0.67 (0.43, 1.06) | 0.088  |
| <b>In Placebo</b>           |                 |                   |        |                   |        |
| <b>Primary endpoint</b>     |                 |                   |        |                   |        |
| 1-SD increment              | 277/1588 (17.4) | 0.76 (0.67, 0.86) | <0.001 | 0.78 (0.67, 0.90) | <0.001 |
| <b>TTR groups</b>           |                 |                   |        |                   |        |
| TTR = 0-25%                 | 116/565 (20.5)  | 1.00 (Ref)        | -      | 1.00 (Ref)        | -      |
| TTR >25-50%                 | 55/223 (24.7)   | 1.27 (0.92, 1.75) | 0.144  | 1.16 (0.83, 1.63) | 0.381  |
| TTR >50-75%                 | 49/249 (19.7)   | 0.95 (0.68, 1.33) | 0.756  | 0.93 (0.65, 1.33) | 0.696  |
| TTR >75-100%                | 57/551 (10.3)   | 0.49 (0.36, 0.67) | <0.001 | 0.55 (0.39, 0.79) | 0.001  |
| <b>All-cause mortality</b>  |                 |                   |        |                   |        |
| 1-SD increment              | 218/1588 (13.7) | 0.81 (0.71, 0.93) | 0.002  | 0.76 (0.65, 0.89) | <0.001 |
| <b>TTR groups</b>           |                 |                   |        |                   |        |
| 0-25%                       | 86/565 (15.2)   | 1.00 (Ref)        | -      | 1.00 (Ref)        | -      |
| >25-50%                     | 45/223 (20.2)   | 1.42 (0.99, 2.03) | 0.059  | 1.24 (0.85, 1.79) | 0.266  |
| >50-75%                     | 37/249 (14.9)   | 0.98 (0.66, 1.43) | 0.900  | 0.82 (0.55, 1.23) | 0.330  |
| >75-100%                    | 50/551 (9.1)    | 0.60 (0.43, 0.85) | 0.004  | 0.56 (0.39, 0.82) | 0.003  |
| <b>Cardiovascular death</b> |                 |                   |        |                   |        |
| 1-SD increment              | 140/1588 (8.8)  | 0.80 (0.68, 0.95) | 0.009  | 0.77 (0.63, 0.93) | 0.006  |
| <b>TTR groups</b>           |                 |                   |        |                   |        |
| TTR = 0-25%                 | 57/565 (10.1)   | 1.00 (Ref)        | -      | 1.00 (Ref)        | -      |
| TTR >25-50%                 | 27/223 (12.1)   | 1.29 (0.81, 2.04) | 0.281  | 1.16 (0.72, 1.87) | 0.535  |
| TTR >50-75%                 | 25/249 (10.0)   | 0.99 (0.62, 1.59) | 0.984  | 0.89 (0.54, 1.46) | 0.646  |

|                           |                 |                   |        |                   |       |
|---------------------------|-----------------|-------------------|--------|-------------------|-------|
| TTR >75-100%              | 31/551 (5.6)    | 0.56 (0.36, 0.87) | 0.010  | 0.55 (0.34, 0.88) | 0.013 |
| <b>HF hospitalization</b> |                 |                   |        |                   |       |
| 1-SD increment            | 184/1588 (11.6) | 0.76 (0.66, 0.88) | <0.001 | 0.82 (0.68, 0.98) | 0.031 |
| TTR groups                |                 |                   |        |                   |       |
| TTR = 0-25%               | 78/565 (13.8)   | 1.00 (Ref)        | -      | 1.00 (Ref)        | -     |
| TTR >25-50%               | 34/223 (15.2)   | 1.15 (0.77, 1.72) | 0.499  | 1.04 (0.68, 1.59) | 0.873 |
| TTR >50-75%               | 34/249 (13.7)   | 0.97 (0.65, 1.45) | 0.890  | 1.00 (0.65, 1.56) | 0.989 |
| TTR >75-100%              | 38/551 (6.9)    | 0.49 (0.33, 0.71) | <0.001 | 0.61 (0.39, 0.96) | 0.031 |

**Table S2. Association Between Time in Target Range and Primary End Point across Different Regions.**

|                                                                     | n / N    | Unadjusted model  |         | Fully adjusted model |         |
|---------------------------------------------------------------------|----------|-------------------|---------|----------------------|---------|
|                                                                     |          | HR (95% CI)       | P value | HR (95% CI)          | P value |
| <b>Americas region (including US, Canada, Argentina and Brazil)</b> |          |                   |         |                      |         |
| 1-SD increment                                                      | 409/1573 | 0.87 (0.79, 0.96) | 0.006   | 0.89 (0.80, 0.99)    | 0.026   |
| TTR Groups                                                          |          |                   |         |                      |         |
| 0-25%                                                               | 152/542  | Reference         | -       | Reference            | -       |
| >25-50%                                                             | 91/291   | 1.19 (0.92, 1.55) | 0.186   | 1.13 (0.87, 1.47)    | 0.371   |
| >50-75%                                                             | 84/339   | 0.82 (0.63, 1.07) | 0.136   | 0.85 (0.64, 1.12)    | 0.244   |
| >75-100%                                                            | 82/401   | 0.73 (0.56, 0.95) | 0.021   | 0.74 (0.56, 0.97)    | 0.040   |
| <b>Russia and Georgia</b>                                           |          |                   |         |                      |         |
| 1-SD increment                                                      | 128/1621 | 0.76 (0.65, 0.89) | 0.001   | 0.96 (0.73, 1.26)    | 0.781   |
| TTR Groups                                                          |          |                   |         |                      |         |
| 0-25%                                                               | 54/513   | Reference         | -       | Reference            | -       |
| >25-50%                                                             | 20/172   | 1.09 (0.65, 1.82) | 0.747   | 1.65 (0.90, 3.00)    | 0.105   |
| >50-75%                                                             | 15/187   | 0.73 (0.41, 1.30) | 0.286   | 1.20 (0.62, 2.33)    | 0.588   |
| >75-100%                                                            | 39/749   | 0.51 (0.33, 0.76) | 0.001   | 0.96 (0.50, 1.82)    | 0.897   |

**Table S3. Association between Time in Target Range and Primary End Point among Patients with**

**Hypertension.**

|                | n / N    | Unadjusted model  |         | Fully adjusted model |         |
|----------------|----------|-------------------|---------|----------------------|---------|
|                |          | HR (95% CI)       | P value | HR (95% CI)          | P value |
| 1-SD increment | 497/2920 | 0.75 (0.68, 0.83) | <0.001  | 0.82 (0.74, 0.91)    | <0.001  |
| <b>Groups</b>  |          |                   |         |                      |         |
| 0-25%          | 301/1456 | Reference         | -       | Reference            | -       |
| >25-50%        | 95/584   | 0.78 (0.62, 0.98) | 0.031   | 0.71 (0.56, 0.89)    | 0.003   |
| >50-75%        | 55/369   | 0.65 (0.49, 0.87) | 0.004   | 0.75 (0.56, 1.00)    | 0.052   |
| >75-100%       | 46/511   | 0.42 (0.31, 0.57) | <0.001  | 0.60 (0.44, 0.82)    | 0.002   |

**Table S4. Association Between Time in Target Range and Primary End Point Using Data from 4 Weeks to 4**

**Months.**

|                | n / N    | Unadjusted model  |         | Fully adjusted model |         |
|----------------|----------|-------------------|---------|----------------------|---------|
|                |          | HR (95% CI)       | P value | HR (95% CI)          | P value |
| 1-SD increment | 511/3078 | 0.77 (0.71, 0.84) | <0.001  | 0.82 (0.74, 0.90)    | <0.001  |
| <b>Groups</b>  |          |                   |         |                      |         |
| 0-25%          | 209/1076 | Reference         | -       | Reference            | -       |
| >25-50%        | 91/397   | 1.22 (0.95, 1.55) | 0.121   | 1.07 (0.83, 1.38)    | 0.595   |
| >50-75%        | 74/375   | 1.02 (0.79, 1.33) | 0.864   | 0.99 (0.75, 1.30)    | 0.940   |
| >75-100%       | 137/1230 | 0.55 (0.44, 0.68) | <0.001  | 0.64 (0.50, 0.81)    | <0.001  |

**Table S5. Association Between Time in Target Range and Primary End Point Using Data from Baseline to**

**12 Months.**

|                | n / N    | Unadjusted model  |         | Fully adjusted model |         |
|----------------|----------|-------------------|---------|----------------------|---------|
|                |          | HR (95% CI)       | P value | HR (95% CI)          | P value |
| 1-SD increment | 374/2935 | 0.76 (0.69, 0.84) | <0.001  | 0.81 (0.71, 0.92)    | 0.001   |
| Groups         |          |                   |         |                      |         |
| 0-25%          | 136/866  | Reference         | -       | Reference            | -       |
| >25-50%        | 95/565   | 1.05 (0.81-1.36)  | 0.718   | 1.00 (0.76, 1.33)    | 0.985   |
| >50-75%        | 59/522   | 0.68 (0.50, 0.93) | 0.014   | 0.65 (0.47, 0.90)    | 0.010   |
| >75-100%       | 84/982   | 0.51 (0.39, 0.67) | <0.001  | 0.64 (0.47, 0.87)    | 0.005   |



Figure S1. Selection of Study Population.

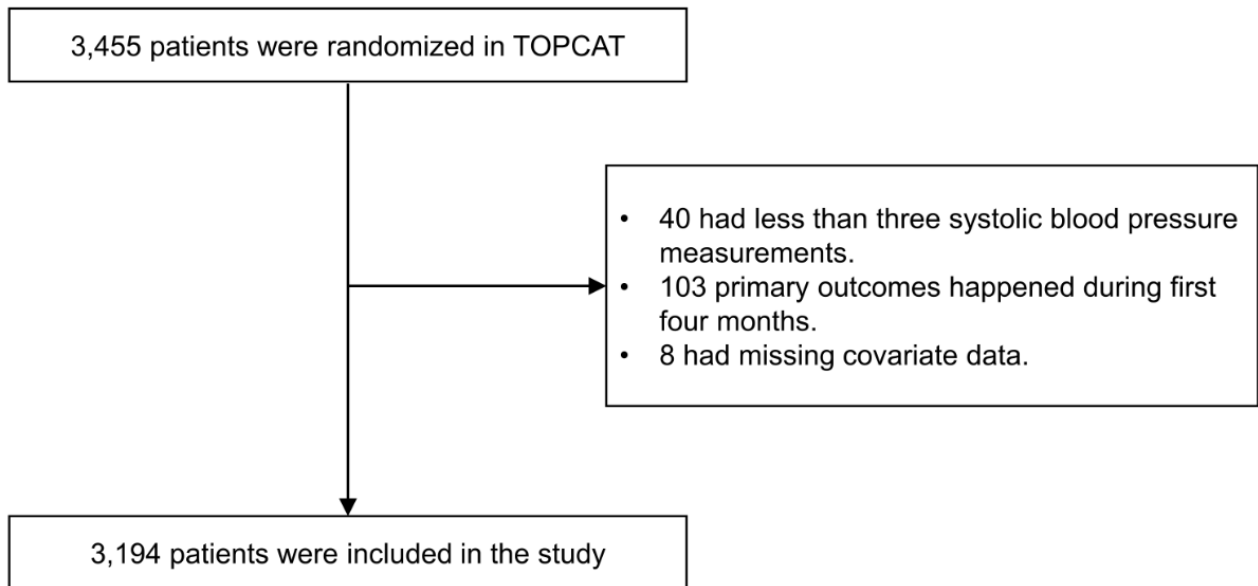

Figure S2. Survival Estimate Across Cardiovascular Outcome According to Time in Target Range Thresholds .

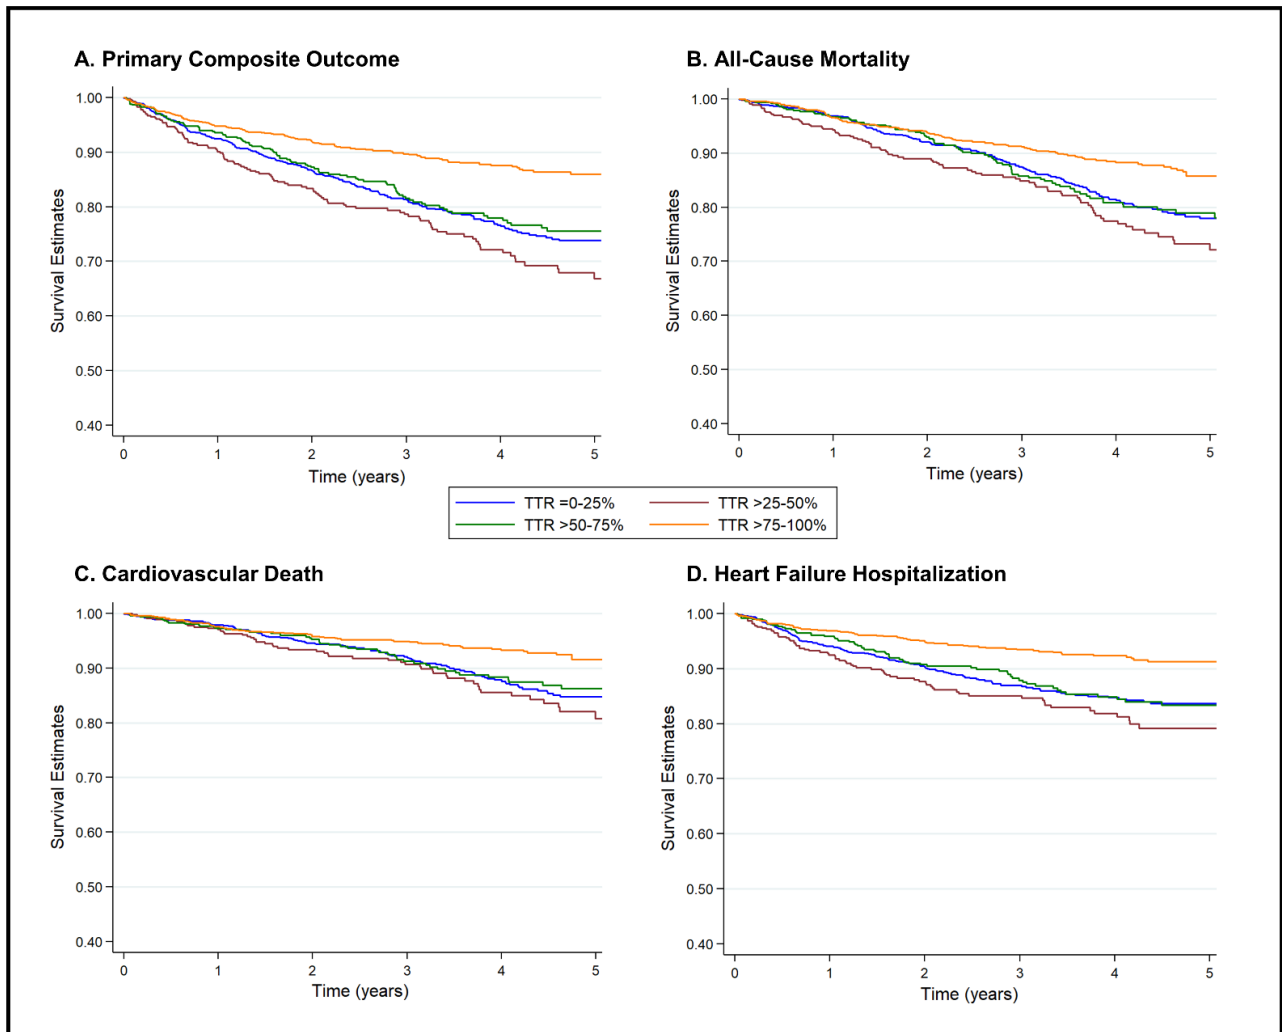

Supplement: JAH3-11-e022765-s001.pdf [file JAH3-11-e022765-s001.pdf]
